# Supplementary material for: Kinematics and extent of the Piemont-Liguria Basin – implications for subduction processes in the Alps
Source: Copernicus journal article supplement (doi:10.5194/se-2020-161), 2020-10-08
Supplement: Supplementary file [file se-2020-161-SC1-supplement.pdf]

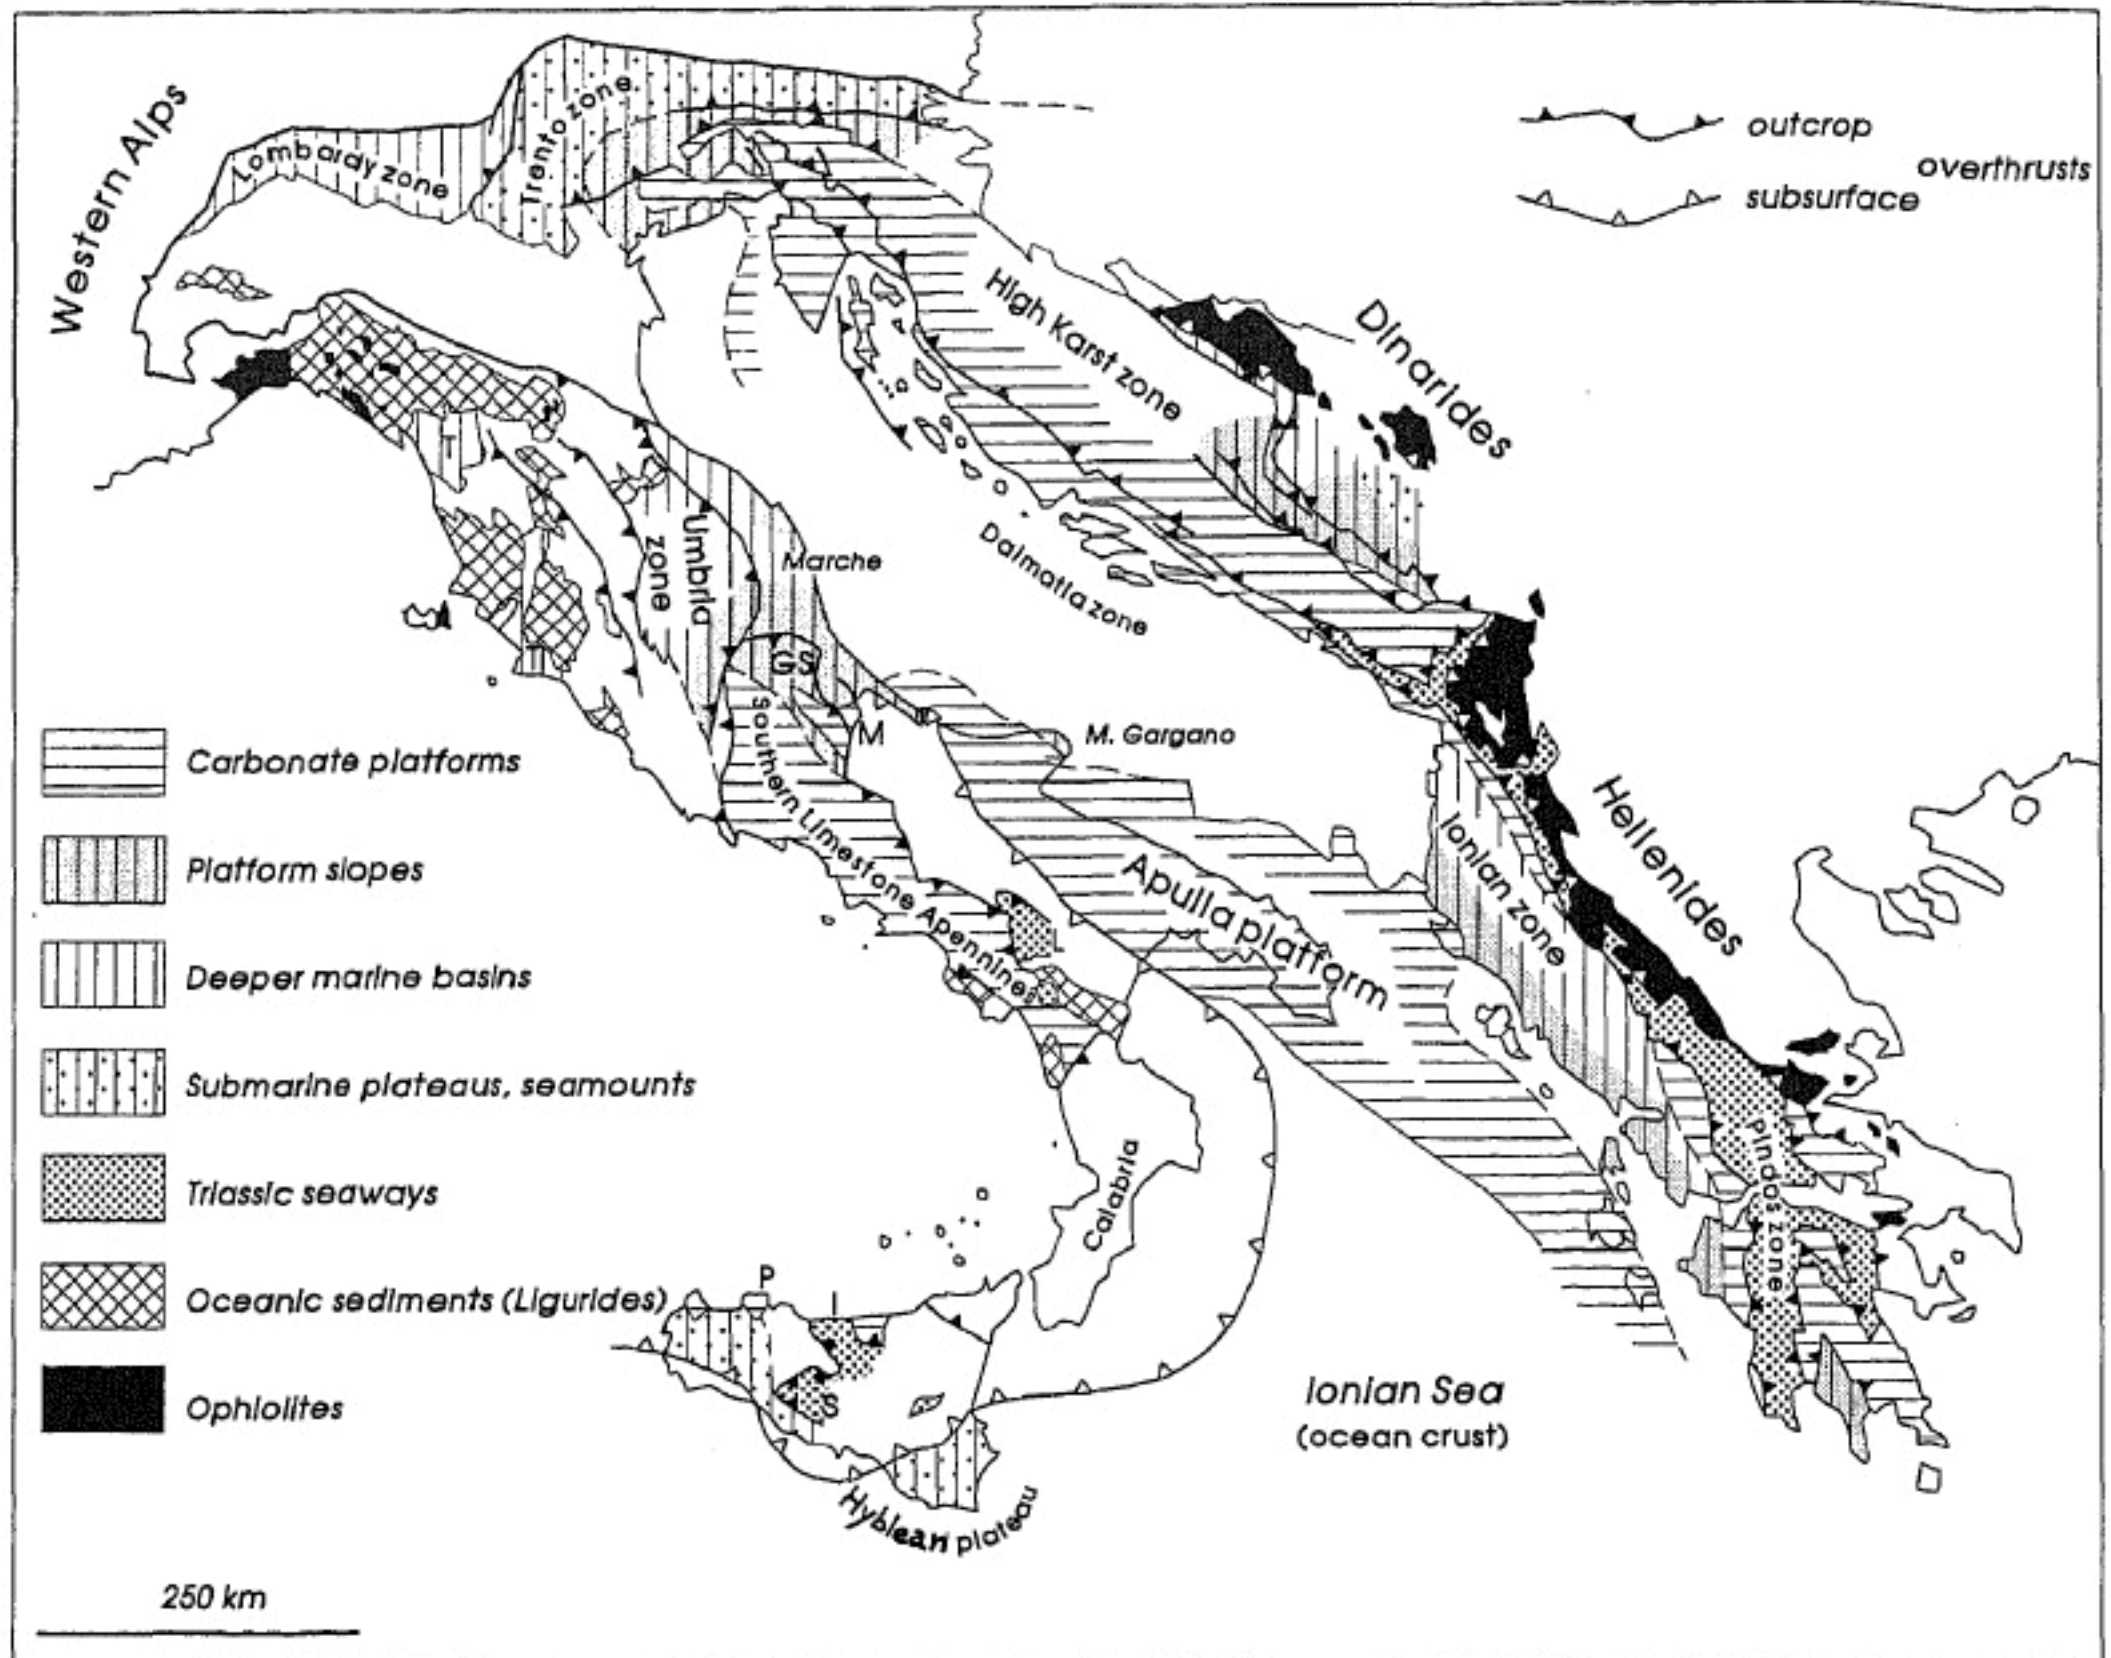

**Figure 18.1** Tectonic units and late Jurassic palaeogeography in the peri-Adriatic area. No palinspastic correction was made (after Bernoulli, 1972; with additions from Cati *et al.*, 1987 and Argnani *et al.*, 1996). (GS, Gran Sasso d'Italia; I, Imerese basin; L, Lagonegro basin; M, Montagna della Maiella, P, Panormic platform; S, Sicani basin; T, Toscanides; the Umbria seamounts are too small to be indicated at this scale).
